# Supplementary material for: A high-rate capability LiFePO4/C cathode achieved by the modulation of the band structures
Source: Royal Society of Chemistry journal article supplement (doi:10.1039/d1ta07757k), 2021-01-01
Supplement: d1ta07757k1.pdf [file d1ta07757k1.pdf]

# Supporting Information

## High-rate capability LiFePO<sub>4</sub>/C cathode assisted with modulated band structures

Li Yang,<sup>a</sup> Ye Tian,<sup>a</sup> Jun Chen,<sup>a</sup> Jinqiang Gao,<sup>a</sup> Zhen Long,<sup>\*c</sup> Wentao Deng,<sup>a</sup> Guoqiang Zou,<sup>a</sup> Hongshuai Hou,<sup>a</sup> and Xiaobo Ji<sup>\*ab</sup>

<sup>a</sup> College of Chemistry and Chemical Engineering, Central South University, Changsha, 410083, China.

Email address: xji@csu.edu.cn;

<sup>b</sup> College of Materials Science and Engineering, Zhengzhou University, Zhengzhou, 450001, China.

<sup>c</sup> Institute of Functional Crystal, Tianjin University of Technology, Tianjin, 300384, China.

Email address: longzhen7561@gmail.com

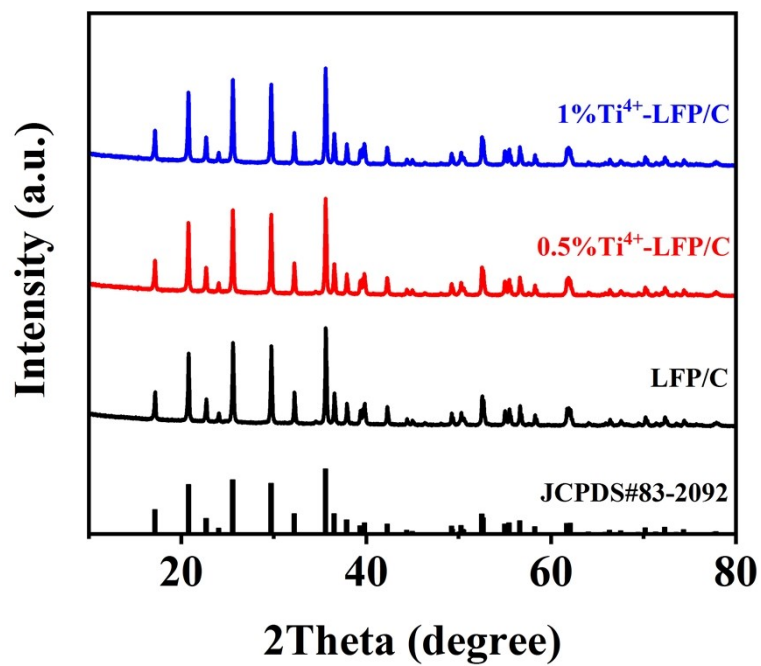

**Fig. S1.** X-ray diffraction (XRD) patterns of synthesized samples.

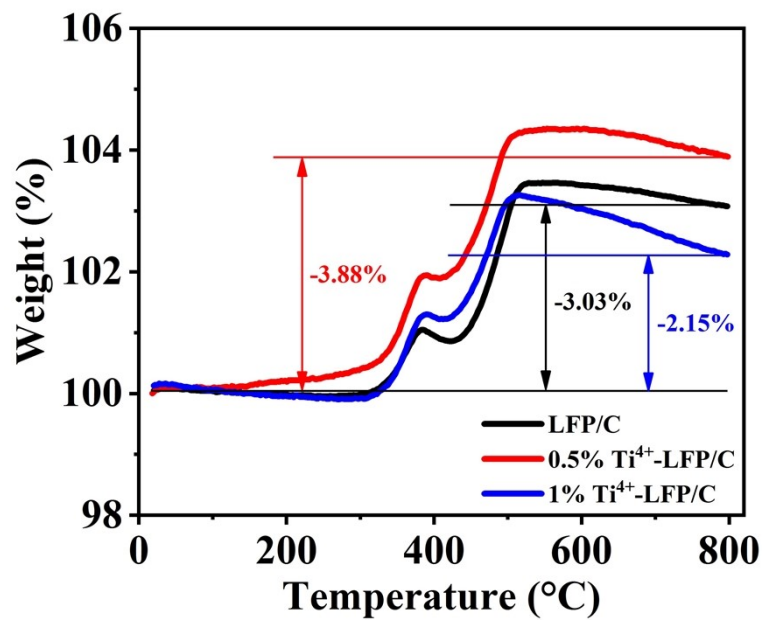

Fig. S2. Thermogravimetry (TG) curves of synthesized samples.

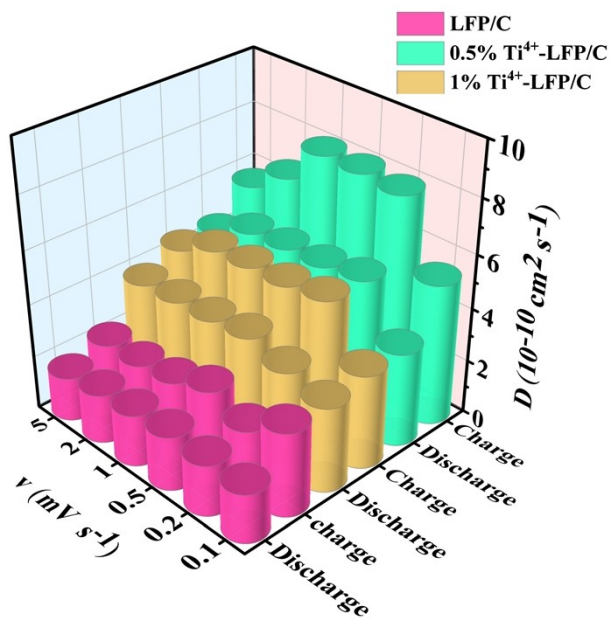

**Fig. S3.** The histogram of Li<sup>+</sup> diffusion coefficients during the charge and discharge with different scan rates.

**Table. S1.** Summary of the potential difference between oxidation peak and reduction peak at different scanning rates.

|                 | <b>LFP/C</b> | <b>0.5%Ti<sup>4+</sup>-LFP/C</b> | <b>1%Ti<sup>4+</sup>-LFP/C</b> |
|-----------------|--------------|----------------------------------|--------------------------------|
| <b>0.1 mV/s</b> | 0.225 V      | 0.173 V                          | 0.183 V                        |
| <b>0.2 mV/s</b> | 0.269 V      | 0.186 V                          | 0.205 V                        |
| <b>0.5 mV/s</b> | 0.365 V      | 0.245 V                          | 0.275 V                        |
| <b>1 mV/s</b>   | 0.498 V      | 0.300 V                          | 0.366 V                        |
| <b>2 mV/s</b>   | 0.65 V       | 0.374 V                          | 0.491 V                        |
| <b>5 mV/s</b>   | 0.939 V      | 0.494 V                          | 0.697 V                        |

**Table S2.** Results of average  $\text{Li}^+$  diffusion coefficient for as-synthesized materials calculated by cyclic voltammetry (CV).

|                                   | LFP/C                  |                        | 0.5% $\text{Ti}^{4+}$ -LFP/C |                        | 1% $\text{Ti}^{4+}$ -LFP/C |                        |
|-----------------------------------|------------------------|------------------------|------------------------------|------------------------|----------------------------|------------------------|
|                                   | Charge                 | Discharge              | Charge                       | Discharge              | Charge                     | Discharge              |
| <b>Equation</b>                   |                        |                        | $y=ax$                       |                        |                            |                        |
| <b>Slope (a)</b>                  | 0.14333                | -0.12712               | 0.24015                      | -0.20868               | 0.18765                    | -0.18131               |
| <b>Adjusted R-square</b>          | 0.99798                | 0.99845                | 0.99425                      | 0.99807                | 0.99976                    | 0.99965                |
| <b><math>D_{\text{Li}}</math></b> | $2.30 \times 10^{-10}$ | $1.81 \times 10^{-10}$ | $6.46 \times 10^{-10}$       | $4.88 \times 10^{-10}$ | $3.95 \times 10^{-10}$     | $3.68 \times 10^{-10}$ |

**Table S3.** Results of average  $\text{Li}^+$  diffusion coefficient for as-synthesized materials calculated by electrochemical impedance spectroscopy (EIS).

|                       | LFP/C                     | 0.5%Ti <sup>4+</sup> -LFP/C | 1%Ti <sup>4+</sup> -LFP/C |
|-----------------------|---------------------------|-----------------------------|---------------------------|
| <b>Equation</b>       |                           | y=a+bx                      |                           |
| <b>Intercept (a)</b>  | 284.86170±1.35850         | 47.57845±2.58782            | 167.08346±2.03473         |
| <b>Slope (b)</b>      | 199.61009±1.50351         | 73.42395±2.86405            | 133.23154±2.25192         |
| <b>Adj. R-square</b>  | 0.99915                   | 0.99573                     | 0.99765                   |
| <b>D<sub>Li</sub></b> | 7.20953×10 <sup>-16</sup> | 5.32840×10 <sup>-15</sup>   | 1.61830×10 <sup>-15</sup> |

**Table S4.** The recent progress of LiFePO<sub>4</sub> about elements doping.

| Samples                                                                                     | Synthetic methods                              | Capacity [mAh g <sup>-1</sup> ]                        | Capacity retention [%]        | Ref.         |
|---------------------------------------------------------------------------------------------|------------------------------------------------|--------------------------------------------------------|-------------------------------|--------------|
| LiFe <sub>0.985</sub> Mg <sub>0.005</sub> Ti <sub>0.01</sub> PO <sub>4</sub>                | Carbothermic reduction + spray drying          | 139.8 at 5 C                                           | 92.9% after 100 cycles at 5 C | 1            |
| Li <sub>0.97</sub> Na <sub>0.03</sub> Fe <sub>0.97</sub> Ti <sub>0.03</sub> PO <sub>4</sub> | High-temperature solid-state                   | 151 at 1 C                                             | 99.4% after 100 cycles at 1 C | 2            |
| 0.5% La and Ce co-doped LiFePO <sub>4</sub> /C                                              | Hydrothermal                                   | 112.1 at 50 C                                          | -                             | 3            |
| S-doped LiFePO <sub>4</sub>                                                                 | Solvothermal                                   | 113 at 10 C                                            | -                             | 4            |
| Mg-doped LiFePO <sub>4</sub> /rGO                                                           | Mechanical mixing + annealing                  | 78 at 20 C                                             | -                             | 5            |
| 0.05 Si and F co-doped LiFePO <sub>4</sub> /C                                               | High-temperature solid-state                   | 70 at 10 C                                             | 88% after 200 cycles at 10 C  | 6            |
| Li <sub>1.035</sub> Zr <sub>0.01</sub> FePO <sub>4</sub> /C                                 | Carbothermic reduction                         | 125 at 20 C                                            | 98.5% after 200 cycles at 5C  | 7            |
| 0.5% Ti <sup>4+</sup> -LFP/C                                                                | Ball milling + carbothermic reduction reaction | 157 at 1 C<br>143 at 5 C<br>136 at 10 C<br>126 at 20 C | 78% after 3000 cycles at 10 C | In this work |



## Reference

- 1 J. Tu, K. Wu, H. Tang, H. Zhou and S. Jiao, *Journal of Materials Chemistry A*, 2017, **5**, 17021-17028.
- 2 H. Shu, X. Wang, W. Wen, Q. Liang, X. Yang, Q. Wei, B. Hu, L. Liu, X. Liu, Y. Song, M. Zho, Y. Bai, L. Jiang, M. Chen, S. Yang, J. Tan, Y. Liao and H. Jiang, *Electrochimica Acta*, 2013, **89**, 479-487.
- 3 B. Zhang, Y. Xu, J. Wang, J. Lin, C. Wang, Y. Chen, *Electrochimica Acta*, 2019, **322**, 134686.
- 4 K. Okada, I. Kimura, K. Machida, *RSC Adv*, 2018, **8**, 5848-5853.
- 5 Y. Huang, H. Liu, L. Gong, Y. Hou and Q. Li, *Journal of Power Sources*, 2017, **347**, 29-36.
- 6 C. Ban, W.-J. Yin, H. Tang, S.-H. Wei, Y. Yan and A. C. Dillon, *Advanced Energy Materials*, 2012, **2**, 1028-1032.
- 7 Y. Li, Y. Zhang, J. Ma, L. Yang, X. Li, E. Zhao, S. Fan, G. Xu, S. Yang and C. Yang, *Journal of The Electrochemical Society*, 2019, **166**, A410-A415.
